# Supplementary material for: Heme-Induced Macrophage Phenotype Switching and Impaired Endogenous Opioid Homeostasis Correlate with Chronic Widespread Pain in HIV
Source: MDPI journal article supplement (doi:10.3390/cells12121565), 2023-06-06
Supplement: s1 [file s1]

**Supplementary Table S1**

| <b>Antibody</b>                                  | <b>Source</b> | <b>Clone</b> | <b>Catalog Number</b> |
|--------------------------------------------------|---------------|--------------|-----------------------|
| Brilliant Violet 605 anti-human CD11b            | BioLegend     | ICRF44       | 301332                |
| PE/Cyanine7 anti-human CD163                     | BioLegend     | GHI/61       | 333614                |
| Brilliant Violet 421 anti-human CD206 (MMR)      | BioLegend     | 15-2         | 321126                |
| APC anti-human CD80                              | BioLegend     | 2D10         | 305220                |
| PE/Dazzle 594 anti-human CD32                    | BioLegend     | FUN-2        | 303218                |
| Brilliant Violet 711 anti-human CD86             | BioLegend     | IT2.2        | 305440                |
| PE/Fire 700 anti-human CD38                      | BioLegend     | S17015A      | 397121                |
| APC anti-mouse F4/80 Antibody                    | BioLegend     | BM8          | 123116                |
| PE anti-mouse CD86 Antibody                      | BioLegend     | GL-1         | 105008                |
| Brilliant Violet 421 anti-mouse CD163 Antibody   | BioLegend     | S15049I      | 155309                |
| Brilliant Violet 510 anti-mouse CD80 Antibody    | BioLegend     | 16-10A1      | 104741                |
| Alexa Fluor 488 anti-mouse/human CD11b Antibody  | BioLegend     | M1/70        | 101217                |
| PE/Cyanine7 anti-mouse CD206 (MMR) Antibody      | BioLegend     | C068C2       | 141720                |
| 7AAD viability staining solution                 | BioLegend     | N/A          | 420403                |
| TruStain FcX™ PLUS (anti-mouse CD16/32) Antibody | BioLegend     | N/A          | 156603                |

**Supplementary Table S1.** The table shows the source of all antibodies that were used to perform FACS analysis in the study.

| Gene           | Forward Primer          | Reverse Primer            |
|----------------|-------------------------|---------------------------|
| IL-6           | TACCACTTCACAAGTCGGAGGC  | CTGCAAGTGCATCATCGTTGTTT   |
| TNF- $\alpha$  | GGTGCCTATGTCTCAGCCTCTT  | GCCATAGAACTGATGAGAGGGAG   |
| HO 1           | CACTCTGGAGATGACACCTGAG  | GTGTTCTCTGTCAGCATCACC     |
| Arg1           | CATTGGCTTGCAGACGTAGAC   | GCTGAAGGTCTCTTCCATCACC    |
| YM1            | TACTCACTTCCACAGGAGCAGG  | CTCCAGTGTAGCCATCCTTAGG    |
| IL-1B          | TGGACCTTCCAGGATGAGGACA  | GTTTCATCTCGGAGCCTGTAGTG   |
| IL-10          | CGGGAAGACAATAACTGCACCC  | CGGTTAGCAGTATGTTGTCCAGC   |
| Fpn or Slc40a1 | CCATAGTCTCTGTCAGCCTGCT  | CTTGCAAGCACTGTGTACCCGT    |
| Erg 2          | CCTTTGACCAGATGAACGGAGTG | CTGGTTTCTAGGTGCAGAGATGG   |
| ACTB           | CATTGCTGACAGGATGCAGAAGG | TGCTGGAAGGTGGACAGTGAGG    |
| GAPDH          | CATCACTGCCACCCAGAAGACTG | ATGCCAGTGAGCTTCCCGTTTCTAG |

**Supplementary Table S2**

Mice Primers

Primers for THP-1 cells

| Gene                                      | Forward Primer          | Reverse Primer          |
|-------------------------------------------|-------------------------|-------------------------|
| IL-10                                     | TCTCCGAGATGCCTTCAGCAGA  | TCAGACAAGGCTTGGAACCCA   |
| TNF alpha                                 | CTCTTCTGCCTGCTGCACTTTG  | ATGGGCTACAGGCTTGCACTC   |
| Cox 2                                     | CGGTGAAACTCTGGCTAGACAG  | GCAAACCGTAGATGCTCAGGGA  |
| APOL3                                     | CCAGTGATCTGCAAATCCTGC   | CTTTCTGCTGCACATATTCGTCC |
| IRF1                                      | GAGGAGGTGAAAGACCAGAGCA  | TAGCATCTCGGCTGGACTTCGA  |
| IL-6                                      | AGACAGCCACTCACCTCTTCAG  | TTCTGCCAGTGCCTCTTTGCTG  |
| Beta actin (ACTB)                         | CACCATTGGCAATGAGCGGTTT  | AGGTCTTTGCGGATGTCCACGT  |
| GAPDH                                     | GTCTCTCTGACTTCAACAGCG   | ACCACCTGTTGCTGTAGCCAA   |
| IL-1 Beta                                 | CCACAGACCTTCCAGGAGAATG  | GTGCAGTTCAGTGATCGTACAGG |
| IRF5                                      | TATGCCATCCGCCTGTGTCAGT  | GCCCTTTTGAACAGGATGAGC   |
| Arg 1                                     | TCATCTGGGTGGATGCTCACAC  | GAGAATCCTGGCACATCGGGAA  |
| CHI3L1 (Ym1)                              | AGGTCACCATTGACAGCAGC    | ATCCTCCTGACCTCGGAACA    |
| Macrophage Inflammatory Protein 4 (CCL18) | GTTGACTATTCTGAAACCAGCCC | GTCGCTGATGTATTCTGGACCC  |

**Supplementary Table S2.** The table shows all the primers that were used to perform real time PCR in the study.

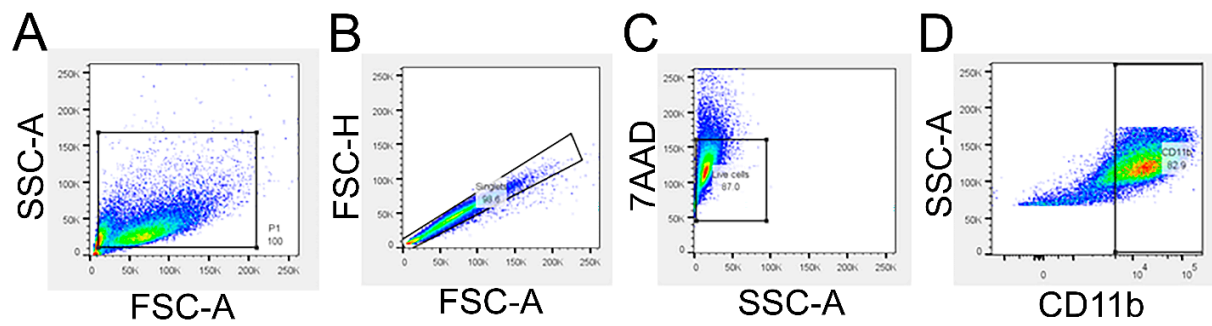

**Supplementary Figure S1. THP-1 macrophages gating strategy.** Representative dot plot shows Forward scatter (FSC) and side scatter (SSC) properties of PMA stimulated THP-1 macrophages (A). The FSC-A/FSC-H plot shows manual gating of single cells proportionate to area and height (B). Next, the dot plot shows live cell gating using 7AAD (viability dye) (C). After the selection of single live cells, the analysis of polarization markers was performed on CD11b positive cells (D).

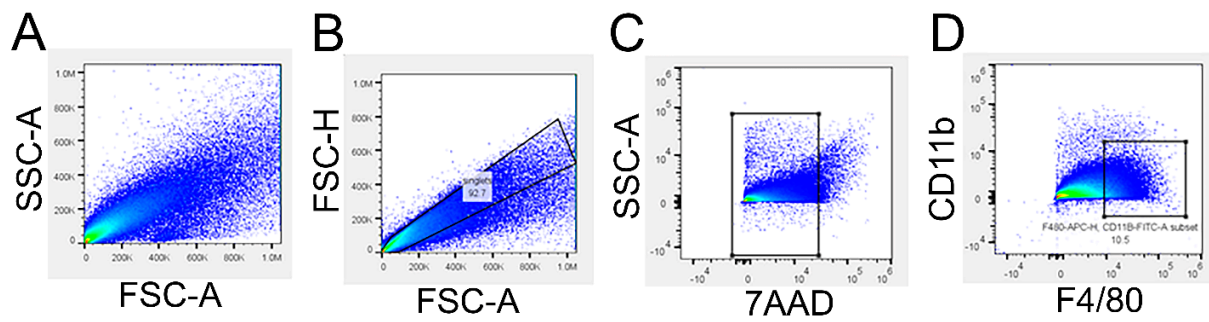

**Supplementary Figure S2. Liver cells gating strategy.** Representative dot plot shows Forward scatter (FSC) and side scatter (SSC) properties of liver macrophage (A). The FSC-H/FSC-A plot shows manual gating of single cells proportionate for area and height (B). Next, the dot plot shows live cell gating using 7AAD (viability dye) (C). After the selection of single live cells, the analysis of polarization markers was performed on all F4/80 positive cells with low CD11b expression (D).
